# Supplementary material for: Universal logic gates via liquid-electronic hybrid divider
Source: Royal Society of Chemistry journal article supplement (doi:10.1039/c2lc40840f), 2012-01-01
Supplement: c2lc40840f.pdf [file c2lc40840f.pdf]

### Supplementary File

In the manuscript, logic gates of AND, IF, OR and NAND have been shown. In this supplementary file, all other logic gates are illustrated for universal logic gate demonstration. The logic gates presented in this file contain False, A doesn't imply B, XOR, NOR, XNOR, NOT A and A Implies B (Sfigure 1-7).

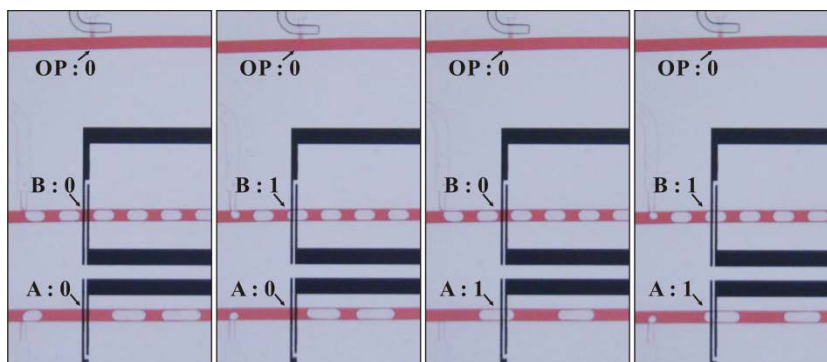

Sfigure-1 False Logic Gate.

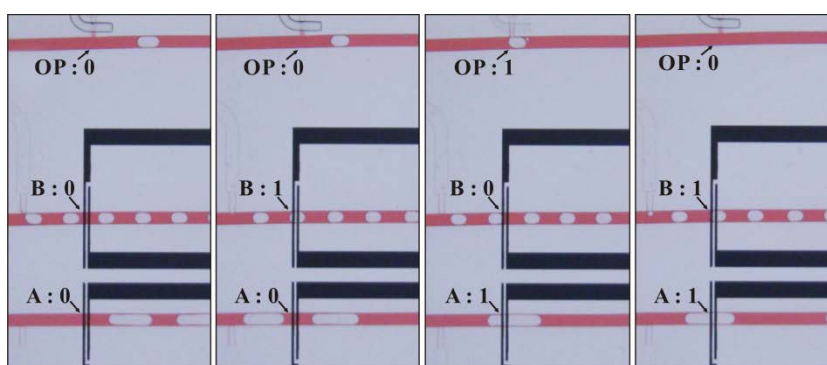

Sfigure-2 A Doesn't Imply B Logic Gate.

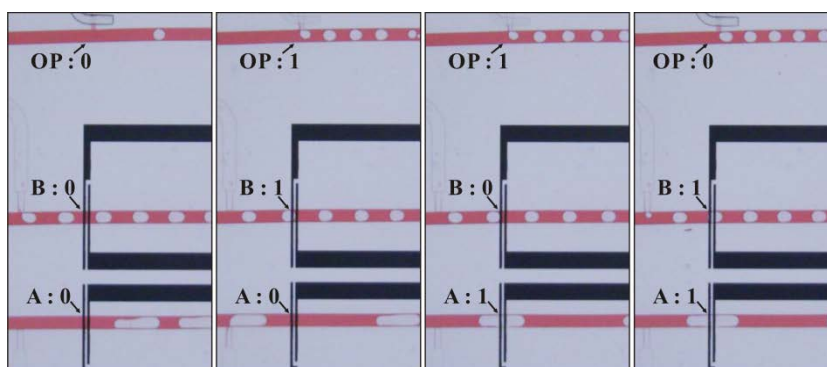

Sfigure-3 XOR Logic Gate.

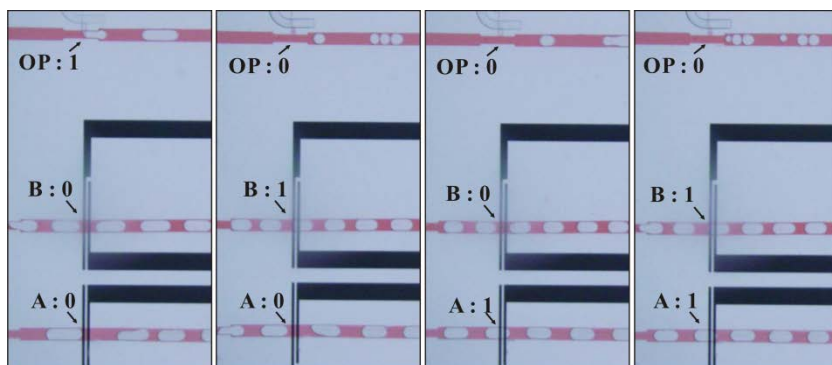

Sfigure-4 NOR Logic Gate.

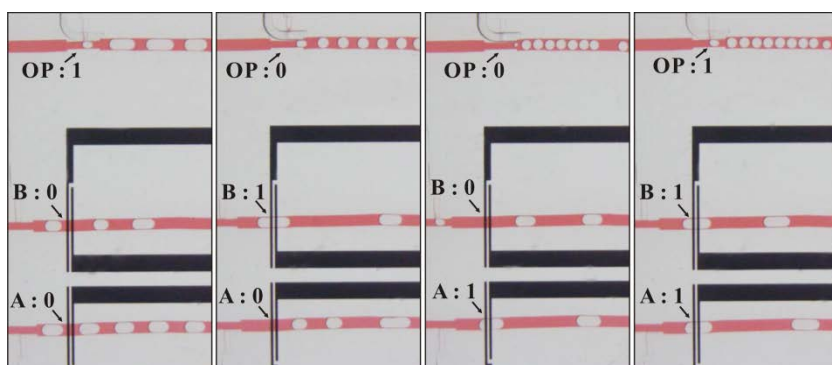

Sfigure-5 XNOR Logic Gate.

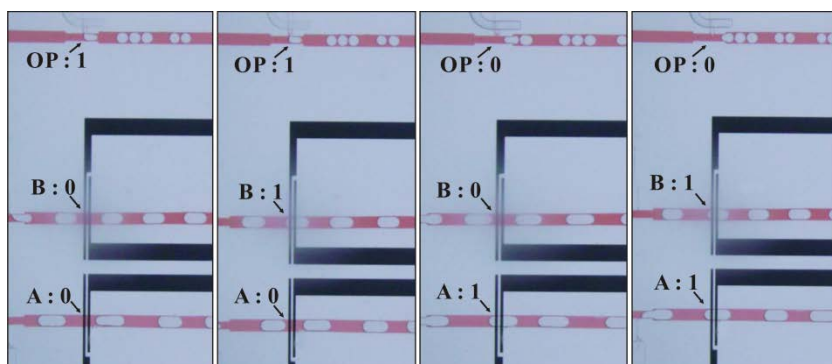

Sfigure-6 NOT A Logic Gate.

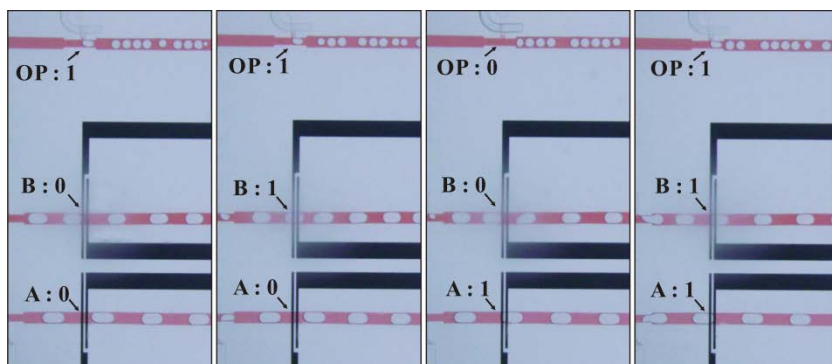

Sfigure-7 A Implies B Logic Gate.
